# Supplementary material for: Measurements of atmospheric He/N 2 as an indicator of fossil fuel extraction and stratospheric circulation
Source: Copernicus journal article supplement (doi:10.5194/amt-2020-313), 2020-09-15
Supplement: Supplementary file 1 [file Data SI.xlsx]

## Sheet: high pressure cylinder analysis
Time (s)	Intensity (mV)	Time_averaged (s)	ST_intensity_averaged (mV)	SA_intensity_averaged (mV)	delta (per mil)
3951.97	1473.87	3957.66	1473.51
3952.62	1473.9
3953.2	1473.85
3953.78	1473.74
3954.39	1473.43
3954.98	1473.35
3955.59	1473.5
3956.17	1473.32
3956.77	1473.29
3957.38	1473.18
3957.97	1473.27
3958.58	1473.36
3959.17	1473.37
3959.77	1473.12
3960.36	1473.46
3960.94	1473.52
3961.55	1473.51
3962.12	1473.83
3962.7	1473.74
3963.28	1473.68
3964.39	1473.59
3965	1473.65
3965.59	1473.5
3966.2	1473.27
3966.81	1473.35
3967.39	1473.23
3967.98	1472.96
3968.56	1472.51
3969.14	1472.35
3969.75	1472.38
3970.33	1472.14
3970.92	1471.67
3971.52	1471.41
3972.11	1471.35
3972.69	1471.34
3973.27	1471.16
3973.88	1471.15
3974.47	1471.22
3975.06	1471.53
3975.64	1471.79
3976.22	1471.98
3976.83	1471.84
3977.41	1471.65
3978.03	1471.63
3978.62	1471.59
3979.2	1471.49
3979.78	1471.44
3980.36	1471.61
3980.95	1471.49
3981.53	1471.44
3982.12	1471.33	3987.71		1471.24	-1.61852
3982.7	1471.36
3983.28	1471.23
3983.88	1471.07
3984.45	1471.2
3985.06	1471.34
3985.64	1471.53
3986.23	1471.2
3986.81	1470.85
3987.39	1470.71
3988	1471
3988.58	1471.14
3989.2	1471.11
3989.78	1470.9
3990.38	1471.18
3990.95	1471.32
3991.53	1471.53
3992.14	1471.7
3992.72	1471.7
3993.31	1471.49
3994.41	1470.93
3995.02	1471
3995.59	1470.99
3996.2	1470.77
3996.78	1470.64
3997.39	1470.89
3997.97	1471.15
3998.56	1471.47
3999.14	1471.99
3999.73	1472.42
4000.31	1472.83
4000.91	1472.96
4001.5	1472.98
4002.11	1473.01
4002.7	1473.28
4003.28	1473.22
4003.88	1473.06
4004.47	1473.31
4005.06	1473.55
4005.64	1473.5
4006.23	1473.5
4006.81	1473.52
4007.41	1473.58
4008.02	1473.42
4008.59	1473.64
4009.19	1473.81
4009.77	1473.59
4010.38	1473.62
4010.95	1473.5
4011.55	1473.73
4012.12	1473.51	4017.73	1473.74
4012.72	1473.37
4013.31	1473.56
4013.91	1473.69
4014.5	1473.91
4015.09	1473.94
4015.69	1474.24
4016.27	1474.03
4016.86	1473.91
4017.44	1473.89
4018.03	1473.75
4018.62	1473.74
4019.22	1473.44
4019.8	1473.76
4020.39	1473.7
4020.97	1473.45
4021.56	1473.62
4022.14	1473.79
4022.73	1473.78
4023.31	1473.83
4024.44	1473.35
4025.03	1473.45
4025.62	1473.35
4026.2	1473.52
4026.81	1473.65
4027.39	1473.45
4027.97	1473.29
4028.56	1472.98
4029.14	1472.65
4029.72	1472.45
4030.3	1472.21
4030.91	1472.01
4031.52	1471.67
4032.12	1471.62
4032.7	1471.43
4033.28	1471.54
4033.89	1471.59
4034.47	1471.67
4035.06	1471.47
4035.64	1471.4
4036.22	1471.32
4036.81	1471.59
4037.39	1471.91
4038	1471.84
4038.58	1471.41
4039.17	1471.19
4039.75	1471
4040.33	1471.11
4040.91	1471.09
4041.52	1471.08
4042.14	1471.4	4047.66		1471.34	-1.61562
4042.72	1471.49
4043.3	1471.55
4043.88	1471.48
4044.45	1471.65
4045.06	1471.65
4045.64	1471.61
4046.22	1471.66
4046.8	1471.61
4047.38	1471.57
4047.95	1471.59
4048.53	1471.51
4049.12	1471.28
4049.7	1471.15
4050.28	1471.01
4050.86	1471
4051.44	1471.09
4052.02	1470.95
4052.61	1470.79
4053.19	1470.78
4054.3	1471.01
4054.88	1471.15
4055.45	1470.96
4056.03	1470.99
4056.61	1471.18
4057.19	1471.4
4057.77	1471.59
4058.38	1471.82
4058.95	1471.88
4059.53	1472.46
4060.12	1473.11
4060.7	1473.3
4061.3	1473.48
4061.89	1473.54
4062.47	1473.72
4063.05	1474.02
4063.62	1473.85
4064.2	1473.71
4064.78	1473.88
4065.39	1473.74
4065.97	1473.52
4066.56	1473.71
4067.16	1473.9
4067.75	1473.85
4068.34	1473.61
4068.92	1473.41
4069.56	1473.82
4070.14	1473.83
4070.72	1473.71
4071.31	1473.53
4071.89	1473.28	4077.55	1473.7
4072.52	1473.34
4073.09	1473.75
4073.7	1473.79
4074.28	1473.71
4074.86	1473.81
4075.47	1474
4076.05	1473.82
4076.66	1473.57
4077.25	1473.63
4077.83	1473.59
4078.42	1473.87
4079.03	1474.02
4079.64	1473.98
4080.22	1473.94
4080.81	1473.91
4081.42	1473.63
4082.03	1473.49
4082.62	1473.41
4083.22	1473.5
4084.36	1473.86
4084.95	1473.47
4085.56	1473.48
4086.16	1473.58
4086.77	1473.53
4087.36	1473.81
4087.95	1473.59
4088.55	1473.51
4089.12	1473.38
4089.73	1472.81
4090.31	1472.6
4090.91	1472.17
4091.5	1471.95
4092.09	1471.99
4092.7	1471.76
4093.28	1471.54
4093.89	1471.3
4094.52	1471.32
4095.12	1471.22
4095.7	1471.29
4096.28	1471.32
4096.89	1471.46
4097.47	1471.41
4098.06	1471.42
4098.64	1471.43
4099.23	1471.71
4099.83	1471.55
4100.42	1471.77
4101.03	1471.88
4101.61	1471.94
4102.19	1471.87	4107.81		1471.15	-1.98826
4102.77	1471.38
4103.34	1471.39
4103.97	1471.19
4104.55	1471.07
4105.14	1471.08
4105.73	1471.09
4106.34	1471.07
4106.95	1470.93
4107.53	1470.87
4108.14	1471.06
4108.72	1470.98
4109.3	1470.98
4109.88	1471.12
4110.45	1471.31
4111.06	1471.14
4111.64	1471.13
4112.23	1471.17
4112.83	1471.08
4113.42	1471.03
4114.55	1471.43
4115.14	1471.61
4115.72	1471.66
4116.33	1471.65
4116.91	1471.65
4117.52	1471.98
4118.09	1472.17
4118.67	1472.56
4119.28	1472.93
4119.86	1473.04
4120.44	1473.43
4121.02	1473.62
4121.59	1473.8
4122.17	1474.25
4122.77	1474.36
4123.38	1474.38
4123.97	1474.63
4124.55	1474.75
4125.12	1474.73
4125.7	1474.65
4126.28	1474.66
4126.86	1474.47
4127.47	1474.72
4128.05	1474.64
4128.64	1474.79
4129.22	1474.68
4129.8	1474.64
4130.41	1474.41
4131	1474.38
4131.61	1474.31
4132.22	1474.51	4137.78	1474.45
4132.8	1474.75
4133.38	1474.87
4133.95	1474.76
4134.55	1474.73
4135.12	1474.92
4135.72	1475.01
4136.3	1474.97
4136.89	1474.46
4137.47	1474.25
4138.05	1474.28
4138.64	1474.29
4139.25	1474.32
4139.84	1474.21
4140.44	1474.13
4141.02	1474.15
4141.62	1474.04
4142.2	1473.98
4142.81	1474.16
4143.39	1474.29
4144.5	1474.17
4145.08	1474.42
4145.66	1474.32
4146.25	1474.19
4146.84	1473.89
4147.42	1473.87
4148	1473.71
4148.58	1473.46
4149.16	1473.03
4149.75	1472.94
4150.33	1472.71
4150.97	1472.52
4151.56	1472.43
4152.16	1472.31
4152.75	1472.27
4153.34	1472.01
4153.95	1472.22
4154.55	1472.01
4155.14	1472.23
4155.75	1472.54
4156.33	1472.4
4156.97	1472.45
4157.55	1472.22
4158.17	1471.89
4158.77	1472.02
4159.38	1471.76
4159.98	1471.62
4160.56	1471.83
4161.19	1471.83
4161.77	1471.86
4162.38	1471.76	4168.04		1471.68	-1.83434
4162.98	1471.88
4163.58	1471.87
4164.19	1471.71
4164.78	1471.46
4165.38	1471.46
4165.97	1471.44
4166.55	1471.39
4167.17	1471.51
4167.77	1471.64
4168.36	1471.58
4168.94	1471.76
4169.55	1471.76
4170.12	1471.74
4170.72	1471.81
4171.3	1471.72
4171.88	1471.77
4172.47	1471.78
4173.06	1471.75
4173.64	1471.85
4174.81	1471.78
4175.41	1471.77
4176	1471.87
4176.59	1471.44
4177.2	1471.64
4177.8	1471.82
4178.38	1471.89
4178.95	1472.33
4179.58	1472.33
4180.17	1472.67
4180.77	1472.74
4181.38	1473.14
4181.97	1473.4
4182.58	1473.74
4183.19	1473.83
4183.78	1473.84
4184.38	1474
4184.95	1474.14
4185.56	1474.04
4186.14	1473.85
4186.72	1473.95
4187.3	1473.97
4187.88	1474.17
4188.47	1474.33
4189.05	1474.41
4189.64	1474.43
4190.25	1474.4
4190.84	1474.45
4191.42	1474.26
4192.03	1474.33
4192.62	1474.39	4198.23	1474.32
4193.2	1474.27
4193.8	1474.39
4194.41	1474.36
4195	1474.29
4195.61	1474.33
4196.19	1474.35
4196.77	1474.45
4197.36	1474.28
4197.94	1474.08
4198.55	1474.07
4199.11	1474.33
4199.7	1474.45
4200.28	1474.43
4200.88	1474.46
4201.47	1474.21
4202.05	1474.23
4202.64	1474.32
4203.22	1474.46
4203.81	1474.26
4204.92	1474.2
4205.55	1474.46
4206.12	1474.38
4206.73	1474.13
4207.31	1474.31
4207.91	1474.04
4208.52	1473.86
4209.09	1473.37
4209.7	1473.22
4210.3	1472.84
4210.89	1472.69
4211.47	1472.71
4212.05	1472.38
4212.62	1472.2
4213.22	1472.13
4213.81	1472.15
4214.39	1472.24
4215	1472.18
4215.59	1472.13
4216.17	1471.91
4216.77	1472.16
4217.34	1472.38
4217.94	1472.44
4218.52	1472.02
4219.11	1471.62
4219.69	1471.66
4220.27	1471.7
4220.86	1471.66
4221.44	1471.69
4222.06	1471.78
4222.7	1471.87	4228.28		1471.72	-1.92181
4223.28	1471.9
4223.86	1472.24
4224.44	1472.22
4225.05	1472.09
4225.62	1471.93
4226.22	1471.79
4226.8	1471.68
4227.38	1471.63
4227.97	1471.37
4228.55	1471.48
4229.16	1471.3
4229.75	1471.61
4230.33	1471.65
4230.92	1471.91
4231.52	1471.75
4232.14	1471.71
4232.72	1471.58
4233.31	1471.34
4233.89	1471.26
4235.02	1471.34
4235.61	1471.43
4236.19	1471.41
4236.77	1471.28
4237.36	1471.24
4237.97	1471.7
4238.56	1471.84
4239.14	1472.34
4239.72	1472.9
4240.31	1473.33
4240.89	1473.78
4241.5	1473.89
4242.08	1474.04
4242.67	1474.15
4243.27	1474.3
4243.86	1474.42
4244.44	1474.74
4245.02	1474.57
4245.61	1474.59
4246.19	1474.44
4246.77	1474.45
4247.34	1474.5
4247.94	1474.67
4248.53	1474.68
4249.12	1474.54
4249.83	1474.61
4250.42	1474.82
4251.02	1474.9
4251.66	1474.82
4252.25	1474.93
4252.84	1474.89	4258.49	1474.78
4253.42	1474.91
4254.02	1474.78
4254.64	1474.62
4255.22	1474.67
4255.81	1474.6
4256.41	1474.38
4257	1474.51
4257.61	1474.87
4258.22	1475.02
4258.81	1474.94
4259.39	1474.94
4260	1474.77
4260.59	1474.94
4261.17	1474.92
4261.77	1474.67
4262.34	1474.68
4262.92	1474.83
4263.53	1474.79
4264.11	1474.83
4265.3	1474.75
4265.91	1474.79
4266.5	1474.9
4267.08	1474.88
4267.69	1475.25
4268.27	1474.9
4268.86	1474.31
4269.45	1473.99
4270.05	1473.73
4270.64	1473.47
4271.22	1473.27
4271.81	1473.28
4272.39	1473.11
4273	1472.99
4273.58	1473
4274.17	1472.35
4274.77	1472.34
4275.34	1472.43
4275.94	1472.38
4276.52	1472.35
4277.12	1472.61
4277.7	1472.7
4278.3	1472.62
4278.89	1472.64
4279.47	1472.51
4280.08	1472.23
4280.66	1472.47
4281.25	1472.51
4281.83	1472.35
4282.41	1472.37
4283	1472.56	4288.6		1472.24	-1.63701
4283.58	1472.48
4284.19	1472.54
4284.78	1472.54
4285.38	1472.52
4285.95	1472.2
4286.53	1472.2
4287.14	1471.98
4287.72	1471.93
4288.31	1471.98
4288.89	1472.09
4289.47	1472.04
4290.06	1471.94
4290.64	1471.86
4291.25	1471.99
4291.83	1472.14
4292.42	1472.1
4293.02	1472.28
4293.62	1472.68
4294.22	1472.83
4295.34	1472.51
4295.94	1472.46
4296.53	1472.24
4297.12	1471.99
4297.7	1471.73
4298.28	1471.68
4298.86	1472.03
4299.47	1472.15
4300.06	1472.51
4300.64	1472.81
4301.22	1473.16
4301.8	1473.39
4302.38	1473.63
4302.97	1473.67
4303.56	1473.8
4304.14	1473.98
4304.72	1474.28
4305.3	1474.29
4305.89	1474.28
4306.5	1474.36
4307.08	1474.46
4307.66	1474.66
4308.25	1474.43
4308.83	1474.42
4309.41	1474.41
4310	1474.54
4310.61	1474.43
4311.19	1474.15
4311.78	1474.13
4312.38	1474.18
4312.95	1474.41	4318.53	1474.54
4313.53	1474.45
4314.11	1474.5
4314.69	1474.78
4315.27	1474.54
4315.84	1474.15
4316.42	1474.32
4317.02	1474.46
4317.64	1474.4
4318.22	1474.53
4318.81	1474.4
4319.39	1474.21
4320	1474.42
4320.59	1474.68
4321.19	1474.83
4321.8	1474.94
4322.39	1474.54
4322.98	1474.68
4323.58	1474.79
4324.16	1474.73
4325.34	1474.6
4325.94	1474.65
4326.52	1474.7
4327.11	1474.59
4327.72	1474.53
4328.3	1474.72
4328.91	1474.54
4329.52	1474.14
4330.11	1473.9
4330.69	1473.53
4331.28	1473.19
4331.88	1473
4332.47	1472.65
4333.06	1472.5
4333.64	1472.64
4334.22	1472.6
4334.8	1472.32
4335.38	1472.41
4335.98	1472.55
4336.56	1472.71
4337.16	1472.63
4337.77	1472.58
4338.34	1472.49
4338.92	1472.37
4339.53	1472.39
4340.12	1472.44
4340.7	1472.26
4341.3	1472.19
4341.89	1472.29
4342.47	1472.36
4343.06	1472.23	4348.67		1472.45	-1.52547
4343.64	1472.4
4344.23	1472.52
4344.81	1472.27
4345.41	1472.23
4346	1472.13
4346.59	1471.95
4347.2	1471.96
4347.8	1472.14
4348.38	1472.38
4348.95	1472.42
4349.55	1472.52
4350.14	1472.7
4350.75	1472.66
4351.34	1472.68
4351.92	1472.75
4352.53	1472.84
4353.12	1472.77
4353.72	1472.69
4354.31	1472.71
4355.44	1472.86
4356.03	1472.86
4356.61	1472.73
4357.22	1472.62
4357.8	1472.61
4358.39	1472.77
4358.97	1473.09
4359.56	1473.61
4360.14	1473.65
4360.75	1473.61
4361.34	1473.94
4361.92	1474.51
4362.53	1474.55
4363.12	1474.26
4363.72	1474.4
4364.31	1474.24
4364.89	1474.14
4365.52	1474.41
4366.11	1474.59
4366.7	1474.62
4367.3	1475.05
4367.89	1475.14
4368.52	1475.14
4369.12	1475.15
4369.72	1475.14
4370.3	1475.03
4370.89	1474.93
4371.5	1474.9
4372.09	1474.89
4372.72	1474.83
4373.3	1475.15	4378.9	1474.86
4373.89	1474.85
4374.47	1474.43
4375.06	1474.54
4375.69	1474.9
4376.28	1474.94
4376.86	1474.67
4377.44	1474.72
4378.03	1474.85
4378.62	1474.89
4379.2	1474.9
4379.81	1474.86
4380.39	1474.92
4380.97	1474.94
4381.55	1475
4382.12	1474.89
4382.72	1474.97
4383.3	1474.84
4383.88	1474.94
4384.45	1474.95
4385.56	1474.93
4386.17	1475.09
4386.78	1475.1
4387.36	1475.13
4387.95	1475.14
4388.53	1475
4389.11	1474.51
4389.69	1474.28
4390.27	1474.18
4390.84	1473.95
4391.42	1473.51
4392.02	1473.06
4392.62	1472.62
4393.22	1472.35
4393.8	1472.5
4394.38	1472.87
4394.97	1473.05
4395.55	1472.96
4396.12	1473.06
4396.7	1472.85
4397.3	1472.66
4397.88	1472.87
4398.47	1472.68
4399.06	1472.56
4399.64	1472.69
4400.28	1472.65
4400.86	1472.45
4401.44	1472.31
4402.03	1472.51
4402.61	1472.81
4403.2	1473.06	4408.79		1472.62	-1.76908
4403.8	1473.05
4404.38	1472.57
4404.95	1472.5
4405.55	1472.74
4406.14	1472.73
4406.72	1472.68
4407.31	1472.6
4407.89	1472.5
4408.47	1472.48
4409.08	1472.56
4409.67	1472.38
4410.3	1472.27
4410.88	1472.23
4411.45	1472.17
4412.05	1472.3
4412.62	1472.95
4413.22	1472.94
4413.8	1472.9
4414.39	1472.76
4415.53	1472.95
4416.11	1472.93
4416.69	1473.02
4417.3	1473.1
4417.88	1472.8
4418.47	1473.04
4419.06	1473.47
4419.66	1473.25
4420.25	1473.31
4420.83	1473.66
4421.44	1474.03
4422.02	1474.46
4422.62	1474.85
4423.2	1474.96
4423.78	1475.12
4424.36	1475.09
4424.94	1475.23
4425.55	1475.53
4426.12	1475.55
4426.72	1475.68
4427.3	1475.41
4427.89	1475.3
4428.47	1475.27
4429.05	1475.04
4429.67	1474.92
4430.25	1474.92
4430.84	1475
4431.42	1475.02
4432.03	1475.12
4432.62	1475.18
4433.2	1475.26	4438.82	1475.6
4433.81	1475.59
4434.41	1475.76
4435	1475.77
4435.59	1475.8
4436.17	1475.69
4436.77	1475.52
4437.34	1475.64
4437.92	1475.46
4438.53	1475.45
4439.11	1475.62
4439.7	1475.77
4440.28	1475.54
4440.89	1475.35
4441.47	1475.33
4442.06	1475.48
4442.66	1475.68
4443.23	1475.76
4443.84	1475.68
4444.44	1475.8
4445.56	1475.7
4446.14	1475.44
4446.73	1475.32
4447.31	1475.27
4447.91	1475.33
4448.5	1475.48
4449.09	1475.17
4449.69	1474.64
4450.28	1474.25
4450.88	1474.07
4451.45	1473.62
4452.08	1473.43
4452.67	1473.38
4453.28	1473.53
4453.88	1473.51
4454.45	1473.23
4455.08	1473.1
4455.67	1472.98
4456.3	1473.13
4456.89	1473.09
4457.47	1473.07
4458.09	1473.17
4458.69	1473.09
4459.3	1472.96
4459.88	1473.05
4460.45	1473.16
4461.06	1473.03
4461.64	1472.85
4462.27	1472.94
4462.84	1473.23
4463.42	1473.15	4469.05		1472.93	-1.85699
4464.03	1472.96
4464.62	1473.02
4465.23	1473.03
4465.83	1473.23
4466.42	1472.91
4467.02	1472.71
4467.59	1472.92
4468.19	1472.96
4468.77	1472.62
4469.36	1472.83
4469.94	1472.58
4470.52	1472.44
4471.11	1472.65
4471.69	1472.82
4472.3	1472.99
4472.89	1473
4473.47	1473.08
4474.05	1473.18
4474.64	1473.46
4475.77	1473.46
4476.36	1473.6
4476.95	1473.65
4477.56	1473.76
4478.16	1473.59
4478.77	1472.93
4479.36	1473.28
4479.94	1473.59
4480.55	1473.96
4481.12	1474.32
4481.7	1474.58
4482.28	1475.15
4482.86	1475.29
4483.44	1475.63
4484.03	1475.71
4484.62	1475.88
4485.2	1475.81
4485.8	1475.76
4486.38	1475.59
4486.95	1475.6
4487.56	1475.57
4488.14	1475.58
4488.72	1475.62
4489.31	1475.55
4489.89	1475.37
4490.48	1475.46
4491.06	1475.52
4491.69	1475.37
4492.28	1475.68
4492.86	1475.75
4493.44	1475.59	4499.06	1475.74
4494.02	1475.77
4494.66	1475.72
4495.23	1475.72
4495.84	1475.49
4496.42	1475.28
4497.02	1475.08
4497.62	1475.15
4498.2	1475.53
4498.8	1475.71
4499.38	1475.69
4499.95	1475.82
4500.55	1475.89
4501.12	1476.01
4501.7	1476.22
4502.3	1476.11
4502.89	1475.95
4503.47	1476.12
4504.05	1476.07
4504.64	1475.86
4505.77	1475.54
4506.34	1475.47
4506.95	1475.68
4507.56	1475.42
4508.14	1475.43
4508.77	1475.42
4509.34	1475.06
4509.94	1474.86
4510.52	1474.58
4511.11	1474.44
4511.7	1474.42
4512.28	1474.05
4512.88	1473.96
4513.45	1474.06
4514.06	1474.01
4514.64	1473.83
4515.27	1473.55
4515.89	1473.43
4516.48	1473.48
4517.08	1473.6
4517.67	1473.52
4518.27	1473.57
4518.86	1473.56
4519.44	1473.25
4520.03	1473
4520.61	1472.98
4521.2	1473.01
4521.78	1473.04
4522.36	1472.94
4522.94	1472.72
4523.55	1473.07	4529.15		1473.28	-1.68497
4524.12	1473
4524.72	1473.09
4525.31	1473.24
4525.92	1473.15
4526.52	1473.31
4527.11	1473.35
4527.7	1473.17
4528.28	1473.11
4528.88	1473.11
4529.45	1473.24
4530.05	1473.3
4530.64	1473.52
4531.23	1473.57
4531.81	1473.36
4532.39	1473.56
4532.97	1473.65
4533.56	1473.47
4534.14	1473.26
4534.73	1473.12
4535.84	1472.99
4536.45	1473.01
4537.05	1473.15
4537.64	1473.1
4538.25	1473.31
4538.83	1473.56
4539.42	1473.9
4540.02	1474.23
4540.62	1474.54
4541.2	1474.83
4541.81	1475.04
4542.41	1475.31
4543	1475.61
4543.58	1475.69
4544.19	1475.67
4544.78	1475.55
4545.38	1475.79
4545.95	1475.78
4546.56	1475.84
4547.14	1475.84
4547.75	1475.53
4548.33	1475.55
4548.92	1475.7
4549.52	1475.68
4550.12	1475.87
4550.72	1475.96
4551.3	1475.84
4551.88	1475.83
4552.45	1475.92
4553.03	1476.06
4553.66	1476.04	4559.29	1475.8
4554.25	1475.77
4554.83	1475.67
4555.41	1475.58
4556	1475.8
4556.62	1475.81
4557.22	1475.71
4557.83	1475.69
4558.41	1475.66
4559	1476.06
4559.59	1476.16
4560.17	1476.18
4560.77	1475.88
4561.34	1475.77
4561.94	1475.58
4562.55	1475.65
4563.14	1475.56
4563.75	1475.81
4564.33	1475.83
4564.94	1475.76
4566.06	1476.14
4566.64	1476.06
4567.25	1475.92
4567.86	1475.86
4568.45	1475.93
4569.06	1475.75
4569.64	1475.48
4570.25	1475.08
4570.84	1474.81
4571.42	1474.34
4572.03	1474.27
4572.61	1473.86
4573.19	1473.81
4573.77	1473.98
4574.34	1474.09
4574.94	1474.23
4575.52	1474.23
4576.11	1473.99
4576.69	1473.74
4577.27	1473.78
4577.84	1473.77
4578.42	1473.74
4579.02	1473.61
4579.59	1473.47
4580.19	1473.3
4580.77	1473.58
4581.36	1473.94
4581.95	1473.86
4582.55	1473.75
4583.14	1473.76
4583.72	1473.67	4589.37		1473.54	-1.47887
4584.36	1473.62
4584.94	1473.79
4585.52	1473.61
4586.11	1473.65
4586.69	1473.74
4587.28	1473.85
4587.88	1473.45
4588.48	1473.38
4589.08	1473.28
4589.66	1473.23
4590.25	1473.12
4590.84	1473.26
4591.44	1473.36
4592.02	1473.38
4592.62	1473.53
4593.22	1473.73
4593.8	1473.79
4594.44	1473.65
4595.02	1473.73
4596.14	1473.93
4596.73	1474.04
4597.33	1473.98
4597.91	1473.7
4598.5	1473.57
4599.08	1473.6
4599.67	1473.75
4600.27	1473.97
4600.84	1474.34
4601.44	1474.44
4602.03	1475.17
4602.61	1475.2
4603.19	1475.47
4603.77	1475.49
4604.36	1475.39
4604.95	1475.16
4605.56	1475.18
4606.14	1475.42
4606.73	1475.69
4607.33	1475.97
4607.91	1475.83
4608.5	1475.61
4609.08	1475.74
4609.67	1475.72
4610.27	1475.64
4610.88	1475.52
4611.45	1475.88
4612.05	1476
4612.66	1475.86
4613.25	1475.58
4613.84	1475.48	4619.45	1475.65
4614.44	1475.68
4615.03	1475.79
4615.62	1475.91
4616.2	1475.85
4616.81	1475.68
4617.39	1475.74
4617.98	1475.57
4618.58	1475.69
4619.16	1475.58
4619.75	1475.32
4620.33	1475.3
4620.94	1475.51
4621.52	1475.6
4622.09	1475.69
4622.67	1475.7
4623.27	1475.79
4623.88	1475.78
4624.45	1475.65
4625.05	1475.64
4626.16	1475.83
4626.77	1475.95
4627.34	1475.63
4627.97	1475.46
4628.55	1475.62
4629.12	1475.65
4629.7	1475.88
4630.3	1475.63
4630.89	1474.77
4631.47	1474.59
4632.05	1474.44
4632.62	1474.23
4633.2	1473.9
4633.78	1473.92
4634.36	1473.7
4634.97	1473.25
4635.55	1473.04
4636.14	1473.35
4636.72	1473.26
4637.3	1473.26
4637.89	1473.5
4638.47	1473.48
4639.06	1473.27
4639.64	1473.16
4640.22	1473.07
4640.8	1473
4641.38	1472.97
4641.97	1472.9
4642.55	1472.63
4643.17	1472.71
4643.8	1472.88	4649.37		1472.52	-2.3882
4644.38	1472.99
4644.95	1472.98
4645.53	1472.58
4646.14	1472.36
4646.75	1472.5
4647.33	1472.15
4647.91	1472.14
4648.5	1472.22
4649.09	1472.36
4649.67	1472.54
4650.25	1472.43
4650.83	1472.36
4651.41	1472.15
4652	1472.15
4652.58	1472.4
4653.17	1472.61
4653.77	1472.74
4654.38	1473.03
4654.95	1472.92
4656.06	1472.76
4656.64	1472.82
4657.22	1472.64
4657.8	1472.89
4658.41	1472.93
4659	1473.05
4659.59	1473.35
4660.17	1473.81
4660.78	1474.4
4661.39	1474.56
4661.97	1474.78
4662.58	1475.18
4663.16	1475.59
4663.75	1475.6
4664.33	1475.87
4664.91	1475.95
4665.52	1475.95
4666.11	1475.97
4666.7	1476.3
4667.3	1476.22
4667.89	1476.28
4668.5	1476.11
4669.09	1476.2
4669.7	1476.78
4670.3	1476.9
4670.89	1476.89
4671.47	1476.93
4672.06	1476.8
4672.67	1476.61
4673.27	1476.63
4673.88	1476.41	4679.5	1476.45
4674.47	1476.43
4675.05	1476.29
4675.66	1476.39
4676.23	1476.32
4676.84	1476.28
4677.47	1476.21
4678.05	1476.32
4678.64	1476.41
4679.22	1476.38
4679.81	1476.28
4680.39	1476.38
4681	1476.45
4681.58	1476.5
4682.16	1476.5
4682.75	1476.5
4683.33	1476.7
4683.91	1476.66
4684.52	1476.8
4685.09	1476.83
4686.22	1476.37
4686.81	1476.05
4687.39	1475.99
4688	1476.25
4688.58	1476.56
4689.16	1476.24
4689.75	1475.98
4690.33	1475.9
4690.94	1475.72
4691.52	1475.31
4692.14	1474.98
4692.73	1474.88
4693.31	1474.75
4693.91	1474.61
4694.5	1474.48
4695.09	1474.6
4695.69	1474.54
4696.27	1474.33
4696.88	1474.26
4697.45	1474.36
4698.05	1474.3
4698.62	1474.19
4699.22	1474.42
4699.8	1474.5
4700.39	1474.36
4700.98	1474.2
4701.59	1474.05
4702.17	1474.12
4702.77	1474.26
4703.34	1474.12
4703.94	1474.04	4709.55		1473.92	-1.84618
4704.53	1473.72
4705.12	1473.73
4705.7	1473.78
4706.28	1473.87
4706.88	1473.81
4707.48	1473.64
4708.06	1473.77
4708.66	1474.06
4709.23	1473.84
4709.81	1474
4710.42	1473.89
4711.03	1473.99
4711.62	1473.96
4712.2	1474.03
4712.8	1474.1
4713.41	1474.29
4714.02	1474.02
4714.61	1473.99
4715.19	1473.8
4716.3	1473.51
4716.88	1473.86
4717.47	1473.78
4718.05	1473.65
4718.64	1474.06
4719.25	1474.1
4719.83	1474.31
4720.42	1474.61
4721.03	1474.92
4721.61	1475.17
4722.19	1475.26
4722.77	1475.58
4723.34	1475.64
4723.92	1475.93
4724.55	1476.14
4725.12	1476.03
4725.7	1476.23
4726.28	1476.19
4726.86	1476.31
4727.44	1476.27
4728.03	1476.4
4728.62	1476.24
4729.2	1476.19
4729.8	1476.12
4730.39	1476.22
4730.97	1476.5
4731.56	1476.54
4732.14	1476.56
4732.73	1476.58
4733.31	1476.72
4733.91	1477.02	4739.53	1476.83
4734.52	1477.16
4735.09	1477.14
4735.69	1477.18
4736.28	1476.89
4736.89	1476.99
4737.47	1476.85
4738.08	1476.98
4738.66	1476.9
4739.25	1476.78
4739.83	1476.56
4740.41	1476.6
4740.98	1476.68
4741.58	1476.63
4742.16	1476.72
4742.75	1476.61
4743.33	1476.58
4743.94	1476.72
4744.56	1476.82
4745.14	1476.84
4746.25	1476.97
4746.83	1476.91
4747.42	1476.86
4748.02	1477.01
4748.59	1477.18
4749.17	1477.19
4749.77	1476.94
4750.34	1476.42
4750.95	1476.18
4751.55	1475.59
4752.16	1475.48
4752.73	1475.26
4753.31	1474.94
4753.91	1474.9
4754.5	1475.05
4755.08	1474.89
4755.67	1474.7
4756.27	1474.84
4756.86	1474.77
4757.44	1474.64
4758.02	1474.65
4758.61	1474.45
4759.23	1474.1
4759.81	1474.24
4760.39	1474.46
4760.98	1474.28
4761.56	1474.12
4762.16	1474.18
4762.75	1474.27
4763.36	1474.4
4763.95	1474.47	4769.54		1474.06	-2.00099
4764.55	1474.37
4765.12	1474.42
4765.72	1474.25
4766.31	1474.08
4766.89	1474.1
4767.48	1474.03
4768.06	1474.04
4768.66	1474.05
4769.23	1473.93
4769.81	1473.9
4770.41	1473.75
4771	1473.7
4771.61	1473.9
4772.19	1473.98
4772.78	1473.88
4773.38	1473.97
4773.97	1474.02
4774.56	1474
4775.14	1474.44
4776.28	1474.54
4776.88	1474.41
4777.48	1474.26
4778.06	1474.12
4778.66	1474.11
4779.25	1474.05
4779.83	1474.66
4780.44	1475
4781.02	1475.37
4781.59	1475.76
4782.17	1476.04
4782.77	1476.15
4783.36	1476.35
4783.95	1476.45
4784.55	1476.37
4785.12	1476.64
4785.7	1476.63
4786.28	1476.65
4786.89	1476.84
4787.5	1477.26
4788.09	1477.22
4788.7	1477.06
4789.28	1477.03
4789.89	1477.14
4790.52	1476.76
4791.09	1476.82
4791.72	1476.95
4792.31	1477.1
4792.89	1477.15
4793.47	1477.12
4794.08	1477.11	4799.68	1477.21
4794.69	1477.09
4795.27	1477.12
4795.86	1477.32
4796.44	1477.45
4797.02	1477.55
4797.62	1477.56
4798.2	1477.16
4798.8	1477.42
4799.38	1477.37
4799.97	1477.21
4800.56	1477.05
4801.14	1476.99
4801.75	1477.01
4802.33	1477.01
4802.94	1477.03
4803.52	1477.26
4804.11	1477.23
4804.69	1477.23
4805.3	1476.96
4806.45	1476.82
4807.05	1476.82
4807.62	1477.07
4808.2	1477.04
4808.8	1476.79
4809.38	1476.77
4809.97	1476.62
4810.56	1476.41
4811.16	1476.39
4811.75	1476.31
4812.36	1475.74
4812.95	1475.63
4813.55	1475.35
4814.16	1475.25
4814.75	1475.07
4815.33	1475.05
4815.91	1475.28
4816.52	1475.07
4817.11	1474.76
4817.7	1474.92
4818.28	1474.86
4818.89	1474.75
4819.48	1474.91
4820.06	1474.71
4820.64	1474.83
4821.25	1474.85
4821.83	1474.71
4822.41	1474.75
4823.02	1475.03
4823.59	1475.2
4824.19	1475.01	4829.75		1474.82	-1.75534
4824.77	1475.07
4825.34	1475.06
4825.94	1475.24
4826.52	1475.18
4827.09	1475.11
4827.67	1475.05
4828.27	1475.11
4828.86	1475.13
4829.45	1474.87
4830.05	1474.81
4830.62	1474.6
4831.2	1474.66
4831.8	1474.77
4832.41	1474.55
4833	1474.58
4833.58	1474.31
4834.17	1474.4
4834.75	1474.47
4835.33	1474.35
4836.45	1474.56
4837.05	1475.01
4837.66	1474.89
4838.23	1474.79
4838.83	1474.7
4839.42	1474.84
4840.02	1475.18
4840.62	1475.56
4841.23	1476.21
4841.81	1476.47
4842.39	1476.79
4842.97	1477.08
4843.56	1477.39
4844.14	1477.45
4844.75	1477.27
4845.33	1477.29
4845.91	1477.32
4846.52	1477.16
4847.09	1477.1
4847.73	1476.94
4848.31	1477.06
4848.91	1477.26
4849.5	1477.31
4850.28	1477.19
4850.88	1477.56
4851.47	1477.69
4852.06	1477.64
4852.67	1477.7
4853.25	1477.58
4853.86	1477.75
4854.44	1477.92	4860.04	1477.61
4855.03	1477.78
4855.62	1477.88
4856.2	1477.63
4856.78	1477.42
4857.38	1477.37
4857.97	1477.46
4858.58	1477.59
4859.16	1477.39
4859.75	1477.47
4860.33	1477.56
4860.94	1477.65
4861.52	1477.7
4862.11	1477.42
4862.69	1477.38
4863.27	1477.99
4863.88	1477.8
4864.45	1477.74
4865.06	1477.56
4865.64	1477.56
4866.78	1478.04
4867.38	1478.18
4867.98	1477.84
4868.59	1477.87
4869.17	1477.77
4869.75	1477.62
4870.33	1477.17
4870.91	1476.75
4871.5	1476.37
4872.11	1476.18
4872.69	1475.9
4873.3	1475.56
4873.89	1475.47
4874.5	1475.25
4875.08	1475.23
4875.66	1475.25
4876.25	1475.11
4876.83	1474.82
4877.41	1474.82
4878	1474.94
4878.58	1475.03
4879.17	1474.93
4879.75	1474.99
4880.33	1474.89
4880.91	1474.88
4881.5	1474.98
4882.08	1475.01
4882.66	1474.92
4883.25	1475
4883.84	1475.02
4884.45	1475.01	4890.05		1475.03	-1.825
4885.06	1475.19
4885.66	1475.15
4886.25	1474.95
4886.83	1475.03
4887.42	1475.12
4888	1475.18
4888.58	1475.15
4889.16	1475.3
4889.77	1475.05
4890.36	1475
4890.94	1474.75
4891.52	1474.91
4892.09	1474.68
4892.67	1474.7
4893.27	1474.9
4893.86	1475.06
4894.47	1475.11
4895.06	1475.08
4895.64	1475.26
4896.75	1475.07
4897.34	1475.1
4897.92	1475.08
4898.5	1475.07
4899.09	1475.07
4899.67	1475.29
4900.25	1475.45
4900.84	1475.7
4901.42	1476.06
4902	1476.43
4902.64	1476.96
4903.22	1477.27
4903.83	1477.51
4904.41	1477.56
4905	1477.46
4905.59	1477.39
4906.19	1477.71
4906.77	1477.54
4907.36	1477.61
4907.95	1477.56
4908.55	1477.38
4909.14	1477.71
4909.75	1477.77
4910.34	1477.77
4910.92	1477.86
4911.52	1478.1
4912.09	1477.86
4912.67	1477.86
4913.27	1477.97
4913.88	1478.07
4914.45	1478.02	4920.06	1477.84
4915.03	1477.95
4915.62	1477.95
4916.2	1478.06
4916.81	1478.12
4917.39	1477.94
4918	1477.7
4918.58	1477.87
4919.16	1477.75
4919.75	1478
4920.34	1478.17
4920.95	1478.03
4921.53	1477.62
4922.12	1477.49
4922.7	1477.34
4923.28	1477.7
4923.91	1477.73
4924.5	1477.8
4925.11	1477.86
4925.69	1477.68
4926.83	1477.72
4927.42	1477.9
4928.02	1477.9
4928.59	1477.77
4929.22	1477.93
4929.83	1478
4930.41	1477.51
4931	1477.55
4931.59	1477.21
4932.2	1476.81
4932.81	1476.67
4933.41	1476.31
4934	1476.05
4934.58	1475.72
4935.19	1475.56
4935.77	1475.21
4936.36	1475.18
4936.95	1475.21
4937.55	1475.41
4938.14	1475.45
4938.73	1475.33
4939.34	1475.31
4939.94	1475.53
4940.52	1475.32
4941.11	1475.34
4941.69	1475.32
4942.28	1475.35
4942.86	1475.35
4943.47	1475.45
4944.08	1475.43
4944.69	1475.73	4950.36		1475.02	-1.79029
4945.27	1475.65
4945.86	1475.39
4946.45	1475.46
4947.06	1475.65
4947.66	1475.49
4948.25	1474.99
4948.86	1474.82
4949.47	1474.95
4950.06	1474.98
4950.66	1474.75
4951.23	1474.55
4951.84	1474.51
4952.45	1474.62
4953.06	1474.64
4953.67	1474.58
4954.25	1474.53
4954.86	1474.75
4955.47	1474.98
4956.06	1475.4
4957.19	1475.3
4957.78	1475.25
4958.38	1475.31
4958.95	1474.91
4959.56	1474.76
4960.14	1475.23
4960.73	1475.53
4961.33	1475.89
4961.91	1476.2
4962.52	1476.22
4963.09	1476.53
4963.69	1476.74
4964.27	1477.14
4964.86	1477.4
4965.44	1477.6
4966.03	1477.75
4966.62	1477.76
4967.22	1477.63
4967.86	1477.5
4968.44	1477.37
4969.03	1477.25
4969.62	1477.27
4970.2	1477.39
4970.81	1477.47
4971.39	1477.54
4971.97	1477.49
4972.56	1477.53
4973.14	1477.5
4973.73	1477.49
4974.34	1477.23
4974.94	1477.22	4980.55	1477.49
4975.53	1477.43
4976.11	1477.56
4976.72	1477.51
4977.31	1477.64
4977.94	1477.57
4978.52	1477.64
4979.09	1477.71
4979.69	1477.76
4980.27	1477.83
4980.86	1477.8
4981.44	1477.56
4982.03	1477.59
4982.61	1477.38
4983.19	1477.34
4983.77	1477.07
4984.34	1477.04
4984.95	1477.23
4985.55	1477.39
4986.16	1477.56
4987.27	1477.56
4987.84	1477.38
4988.44	1477.22
4989.03	1477.15
4989.61	1477.24
4990.23	1476.97
4990.84	1476.67
4991.42	1476.28
4992	1476.19
4992.58	1476.01
4993.19	1475.73
4993.77	1475.78
4994.34	1475.6
4994.92	1475.39
4995.52	1475.24
4996.09	1475.14
4996.67	1475.05
4997.27	1474.73
4997.84	1474.58
4998.42	1474.74
4999.02	1474.83
4999.59	1475.2
5000.2	1474.95
5000.78	1474.79
5001.36	1474.8
5001.94	1474.78
5002.52	1474.54
5003.09	1474.56
5003.67	1474.61
5004.25	1474.74
5004.84	1474.69	5010.55		1474.86	-1.78891
5005.44	1474.51
5006.03	1474.68
5006.61	1474.81
5007.22	1474.98
5007.83	1475
5008.42	1475.19
5009.02	1475.16
5009.64	1474.96
5010.22	1475
5010.84	1474.97
5011.45	1474.88
5012.03	1474.69
5012.67	1474.54
5013.28	1474.67
5013.89	1474.82
5014.48	1474.88
5015.08	1474.75
5015.66	1475
5016.25	1475.09
5017.39	1474.99
5018	1474.79
5018.59	1474.8
5019.17	1474.69
5019.78	1474.53
5020.38	1474.57
5020.97	1474.52
5021.55	1474.95
5022.19	1475.69
5022.81	1476.25
5023.39	1476.66
5024.05	1476.92
5024.64	1477.03
5025.25	1477.17
5025.83	1477.14
5026.42	1477.21
5027.05	1477.16
5027.66	1477.12
5028.27	1477.26
5028.84	1477.34
5029.42	1477.53
5030.03	1477.67
5030.62	1477.75
5031.22	1477.62
5031.81	1477.5
5032.44	1477.28
5033.03	1477.1
5033.62	1477.24
5034.27	1477.82
5034.86	1477.74
5035.5	1477.68	5041.21	1477.52
5036.09	1477.59
5036.69	1477.43
5037.31	1477.33
5037.91	1477.25
5038.52	1477.2
5039.12	1477.45
5039.72	1477.58
5040.3	1477.57
5040.91	1477.63
5041.52	1477.54
5042.12	1477.69
5042.72	1477.5
5043.31	1477.33
5043.91	1477.17
5044.52	1477.33
5045.12	1477.49
5045.72	1477.75
5046.31	1477.84
5046.95	1478.11
5048.17	1477.54
5048.78	1477.52
5049.41	1477.41
5050.03	1477.44
5050.7	1477.26
5051.33	1477.13
5051.97	1477.05
5052.59	1476.8
5053.19	1476.72
5053.81	1476.46
5054.42	1476.19
5055.03	1476
5055.62	1475.61
5056.22	1475.41
5056.83	1475.28
5057.47	1475.07
5058.08	1475.03
5058.67	1474.82
5059.27	1475.03
5059.86	1474.96
5060.44	1474.7
5061.06	1474.69
5061.66	1474.54
5062.25	1474.72
5062.84	1474.77
5063.42	1474.98
5064.02	1474.76
5064.59	1474.77
5065.2	1474.67
5065.78	1474.93
5066.36	1475.12	5072.11		1474.88	-1.73543
5066.94	1475.01
5067.56	1474.8
5068.2	1474.99
5068.8	1475.05
5069.39	1474.94
5069.97	1474.7
5070.58	1474.75
5071.19	1474.66
5071.86	1474.53
5072.47	1474.26
5073.06	1474.47
5073.66	1474.78
5074.25	1474.97
5074.83	1474.96
5075.41	1475.14
5076	1474.98
5076.61	1475.02
5077.22	1475.12
5077.84	1475.42
5078.95	1475.23
5079.58	1475.38
5080.2	1475.25
5080.78	1475.14
5081.39	1475.18
5082	1475.34
5082.62	1475.25
5083.2	1475.59
5083.81	1476.09
5084.41	1476.5
5085.03	1476.66
5085.66	1476.83
5086.25	1477.27
5086.86	1477.42
5087.47	1477.43
5088.06	1477.55
5088.66	1477.76
5089.25	1477.58
5089.84	1477.44
5090.42	1477.48
5091.03	1477.65
5091.62	1477.6
5092.22	1477.42
5092.81	1477.24
5093.39	1477.44
5093.97	1477.43
5094.56	1477.41
5095.17	1477.57
5095.77	1477.64
5096.38	1477.79
5096.95	1477.62	5102.61	1477.37
5097.53	1477.69
5098.12	1477.69
5098.7	1477.63
5099.3	1477.43
5099.88	1477.32
5100.47	1477.17
5101.06	1477.17
5101.66	1477.33
5102.33	1477.17
5102.92	1477.43
5103.52	1477.28
5104.12	1477.34
5104.72	1477.39
5105.31	1477.37
5105.91	1477.45
5106.52	1477.27
5107.11	1477.2
5107.7	1477.2
5108.28	1477.29
5109.44	1477.78
5110.03	1477.81
5110.67	1477.7
5111.27	1477.34
5111.89	1477.49
5112.53	1477.35
5113.12	1476.99
5113.75	1476.81
5114.38	1476.37
5114.97	1476.16
5115.56	1476.42
5116.14	1476.14
5116.77	1476.03
5117.34	1475.97
5117.94	1475.7
5118.55	1475.49
5119.14	1475.58
5119.77	1475.21
5120.38	1475.39
5120.98	1475.23
5121.59	1475.42
5122.19	1475.7
5122.78	1475.58
5123.38	1475.2
5123.98	1474.71
5124.56	1474.82
5125.16	1474.93
5125.75	1474.99
5126.33	1475.09
5126.97	1475.06
5127.55	1475.19	5133.38		1475.05	-1.83884
5128.17	1475.18
5128.8	1475.2
5129.45	1475.15
5130.06	1475.06
5130.64	1475.02
5131.25	1475.03
5131.88	1474.9
5132.47	1475.04
5133.08	1474.96
5133.69	1474.91
5134.31	1474.87
5134.91	1474.74
5135.52	1475.14
5136.12	1475.07
5136.72	1475.09
5137.31	1475.06
5137.92	1475.25
5138.53	1475
5139.14	1475.13
5140.28	1475.03
5140.88	1475.01
5141.5	1475.01
5142.08	1475.13
5142.69	1474.86
5143.27	1475.08
5143.86	1475.4
5144.44	1475.87
5145.02	1476.02
5145.66	1476.39
5146.25	1477.02
5146.83	1477.19
5147.41	1477.38
5148.02	1477.74
5148.67	1478.06
5149.28	1478.02
5149.88	1477.88
5150.52	1477.89
5151.09	1477.94
5151.69	1477.9
5152.28	1478.07
5152.88	1477.85
5153.47	1477.61
5154.05	1477.72
5154.66	1477.67
5155.25	1477.65
5155.83	1477.65
5156.41	1477.59
5157.02	1477.86
[truncated: 14,161 more rows]

## Sheet: repeat measurements
Tank name	run date	flow SA (cm^3/min)	flow ST (cm^3/min)	flow imabalnce (cm^3/min)	delta HeM (per meg)	std (per meg)	precision (per meg)	run t	cycle n
Cylinder B	2020-03-23	24.45	24.65	-0.2	-629.446	107.492	6.38975	5.30869	283
Cylinder B	2020-03-24	24.75	24.7	0.05	-627.887	125.426	8.16451	6.32038	236
Cylinder B	2020-03-25	24.7	24.6	0.1	-622.867	118.365	8.43314	6.70859	197
Cylinder B	2020-03-26	24.65	24.75	-0.1	-626.202	120.427	7.32898	8.10901	270
Cylinder B	2020-03-30	24.4	24.4	0	-613.678	121.606	7.00925	8.21332	301
Cylinder A	2020-05-13	27.25	27.35	-0.1	-775.115	121.108	8.58512	4.79711	199
Cylinder A	2020-05-14	27.4	27.4	0	-792.014	119.77	6.9265	7.32285	299
Cylinder A	2020-05-15	27.85	27.8	0.05	-769.674	112.447	6.53583	6.99507	296
Cylinder A	2020-05-16	27.5	27.45	0.05	-769.973	121.791	7.55317	6.58399	260
Cylinder A	2020-05-17	27.05	27	0.05	-788.629	111.313	5.45103	8.20378	417
Cylinder A	2020-05-18	26.85	27	-0.15	-780.762	108.229	11.104	2.52537	95
Cylinder A	2020-05-20	26.6	26.6	0	-775.808	123.979	6.94148	7.34416	319
Cylinder A	2020-05-21	26.8	26.75	0.05	-779.949	113.582	6.02832	7.73107	355

## Sheet: zero enrichment determination
run date	flow SA (cm^3/min)	flow ST (cm^3/min)	flow imbalance (cm^3/min)	pressure (psi)	delta HeM (per meg)	std delta (per meg)	precision (per meg)	cycle n
2020-04-24	32.25	32.15	0.1	14	-12.8529	120.036	13.5051	79
2020-04-24	32.25	32.15	0.1	9	-71.1247	155.775	15.6559	99
2020-04-24	32.3	32.25	0.05	16	-36.3371	93.6242	12.0868	60
2020-04-25	31.65	31.2	0.45	9	-20.4784	156.314	17.4765	80
2020-04-25	31.4	31.2	0.2	14	-16.5732	119.982	13.4144	80
2020-04-25	31.2	31.15	0.05	16	-29.8196	107.87	12.0603	80
2020-04-27	29.8	29.7	0.1	9	-26.0985	169.32	18.9306	80
2020-04-27	29.8	29.65	0.15	14	-13.088	109.07	10.907	100
2020-04-27	29.75	29.6	0.15	16	-44.6192	103.542	12.2882	71
2020-04-28	30	28.95	1.05	6	-28.7427	261.004	24.0274	118
2020-04-28	30.35	29	1.35	9	55.3564	192.426	21.5139	80
2020-04-28	30.05	28.9	1.15	14	-4.10815	130.237	16.8136	60
2020-04-28	30.1	28.85	1.25	16	12.2713	114.605	12.8133	80
2020-04-29	29.85	30.95	-1.1	9	-52.352	201.724	22.5534	80
2020-04-29	29.8	30.85	-1.05	14	-20.1594	112.017	14.4613	60
2020-04-29	29.75	30.8	-1.05	16	-23.8991	105.921	11.9932	78
2020-04-29	24.65	24.7	-0.05	14	-23.0753	118.731	14.1911	70
2020-04-30	24.5	24.5	0	9	8.91842	174.825	19.546	80
2020-04-30	24.45	24.5	-0.05	14	19.9816	127.307	12.7307	100
2020-04-30	24.45	24.45	0	16	-5.19612	120.514	11.6505	107
2020-05-01	24.25	24.05	0.2	9	-8.35446	179.209	20.0361	80
2020-05-01	24.25	24.05	0.2	14	7.65833	118.659	13.2665	80
2020-05-01	24.2	24	0.2	16	-9.9525	99.9604	9.99604	100
2020-05-01	23.9	23.95	-0.05	14	9.5658	110.26	14.2345	60
2020-05-04	23.8	24.45	-0.65	9	-36.0728	179.978	20.2491	79
2020-05-04	23.75	24.45	-0.7	14	-2.82559	130.42	11.9056	120
2020-05-04	23.7	24.4	-0.7	16	-19.71	107.711	10.7711	100
2020-05-05	24.9	23.9	1	9	15.0802	185.119	18.6051	99
2020-05-05	24.85	23.85	1	14	30.382	134.96	17.4232	60
2020-05-05	25	23.8	1.2	16	-10.7478	90.1254	12.3797	53
2020-05-06	24.75	24.65	0.1	9	30.9873	179.808	17.9808	100
2020-05-06	24.65	24.6	0.05	14	27.7393	115.445	11.5445	100
2020-05-06	24.6	24.55	0.05	16	15.7558	108.733	12.64	74
2020-05-07	30.5	30.55	-0.05	9	13.4338	175.934	17.8634	97
2020-05-07	30.45	30.45	0	14	3.75876	117.629	11.7629	100
2020-05-07	30.4	30.4	0	16	-1.02155	129.647	20.7601	39
2020-05-08	29.6	29.5	0.1	14	-8.75839	93.1287	10.4121	80
2020-05-08	28.85	29.5	-0.65	14	-2.30791	121.449	12.1449	100
2020-05-08	25.45	25.6	-0.15	14	-15.5619	120.02	13.4186	80
2020-05-12	23.2	23.15	0.05	14	5.15397	130.555	11.154	137
2020-05-12	27.3	27.3	0	14	11.786	123.908	13.8534	80
2020-05-12	28.3	27.4	0.9	14	32.4817	123.006	11.2288	120
2020-05-12	27.2	27.3	-0.1	14	11.9814	115.536	12.9173	80
